# Supplementary material for: A highly efficient and reusable amorphous Pd(ii)/crystal Pd(0)-grafted porous polymer framework for catalytic CO2 cycloaddition
Source: Royal Society of Chemistry journal article supplement (doi:10.1039/d3nj03851c), 2024-01-01
Supplement: d3nj03851c1.pdf [file d3nj03851c1.pdf]

## Supporting Information

### **Highly Efficient and Reusable Amorphous Pd(II)/Crystal Pd(0)-Grafted Porous Polymer Framework for Catalytic CO<sub>2</sub> Cycloaddition**

Somnath Sarkar,<sup>a</sup> Swarbhanu Ghosh,<sup>b</sup> Titu Mondal,<sup>a</sup> Aslam Khan<sup>c</sup> and Sk. Manirul Islam<sup>a,\*</sup>

<sup>a</sup>*Department of Chemistry, University of Kalyani, Kalyani, Nadia, 741235, W.B., India*

<sup>b</sup>*Department of Chemistry, McGill University, Montréal, Québec H3A 0B8, Canada*

<sup>c</sup>*College of Science, King Saud University, Riyadh, 11451, Saudi Arabia*

\*To whom correspondence should be addressed. E-mail: [manir65@rediffmail.com](mailto:manir65@rediffmail.com)

Number of pages: 13

Number of figures: 4

Number of Table: 1

## Table of Contents

|                                                    |     |
|----------------------------------------------------|-----|
| Materials and Equipments.....                      | S2  |
| FT-IR of recovered Pd@3D PPF.....                  | S2  |
| PXRD pattern of the recovered Pd@3d PPF .....      | S3  |
| SEM Images of recovered Pd@3D PPF.....             | S3  |
| XPS spectra of the recovered catalyst.....         | S4  |
| Comparison of Pd@3D PPF with other catalysts ..... | S4  |
| NMR Spectra of compound 2a.....                    | S5  |
| NMR Spectra of compound 2b.....                    | S6  |
| NMR Spectra of compound 2c.....                    | S7  |
| NMR Spectra of compound 2d.....                    | S8  |
| NMR Spectra of compound 2e.....                    | S9  |
| NMR Spectra of compound 2f.....                    | S10 |
| NMR Spectra of compound 2g.....                    | S11 |
| References.....                                    | S12 |

## Materials and Equipments

All oxiranes were purchased from a commercial supplier.  $^1\text{H}$  NMR spectra were recorded on Bruker DPX-300/500 NMR spectrometer at a temperature of 298 K.

A D8 Advance SWAX diffractometer from Bruker-AXS utilizing a constant current (40 mA) and voltage (40 kV) was used to obtain the PXRD pattern of the Pd nanoparticles decorated 3D PPF catalyst. The XRD machine was calibrated with silicon sample utilizing Ni-filtered Cu K $\alpha$  radiation ( $\lambda=0.15406$  nm). Quantachrome Autosorb-iQ (USA) surface area analyser was used for  $\text{N}_2$  sorption analysis at 77 K. The sample was activated at 403 K for 12 h under high vacuum before the adsorption of gas. Pore size distribution was obtained by using NLDFT method employing the carbon/cylindrical pore model as reference. JEOL JEM 6700 field emission-scanning electron microscope (FE SEM) was employed to analyze particle size and morphology of Pd@3D PPF. FT-IR (Nicolet MAGNA-FT IR 750 spectrometer Series II) was used to understand the coordination.  $^1\text{H}$  spectra of the desired products were kept on a Bruker DPX-300/500 NMR spectrometer.

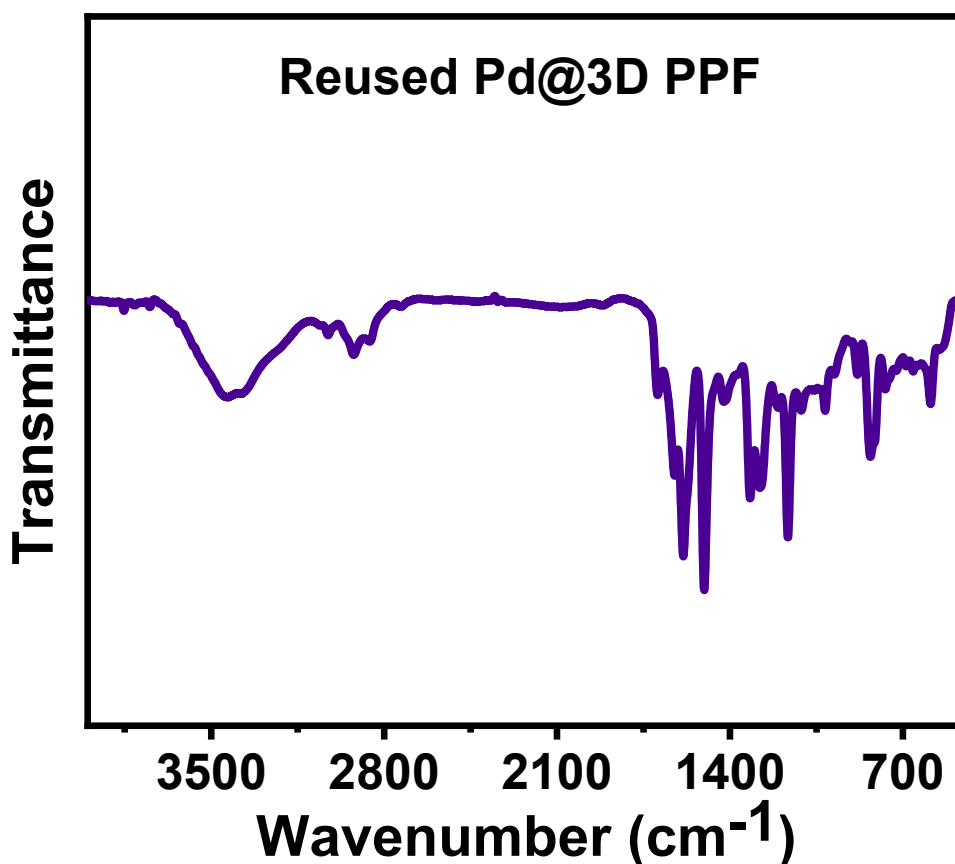

Figure S1. FT-IR spectrum of the recovered catalyst (Pd@3D PPF) after 5<sup>th</sup> run.

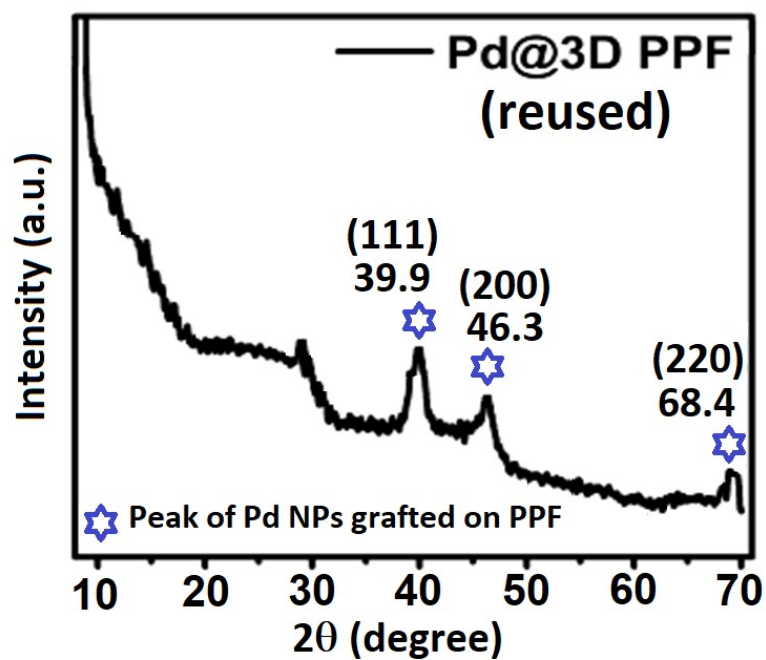

**Figure S2.** PXRD pattern of the recovered Pd@3d PPF after 5<sup>th</sup> run.

The PXRD pattern of the recovered Pd@3D PPF catalyst confirms the retention of its original structural integrity.

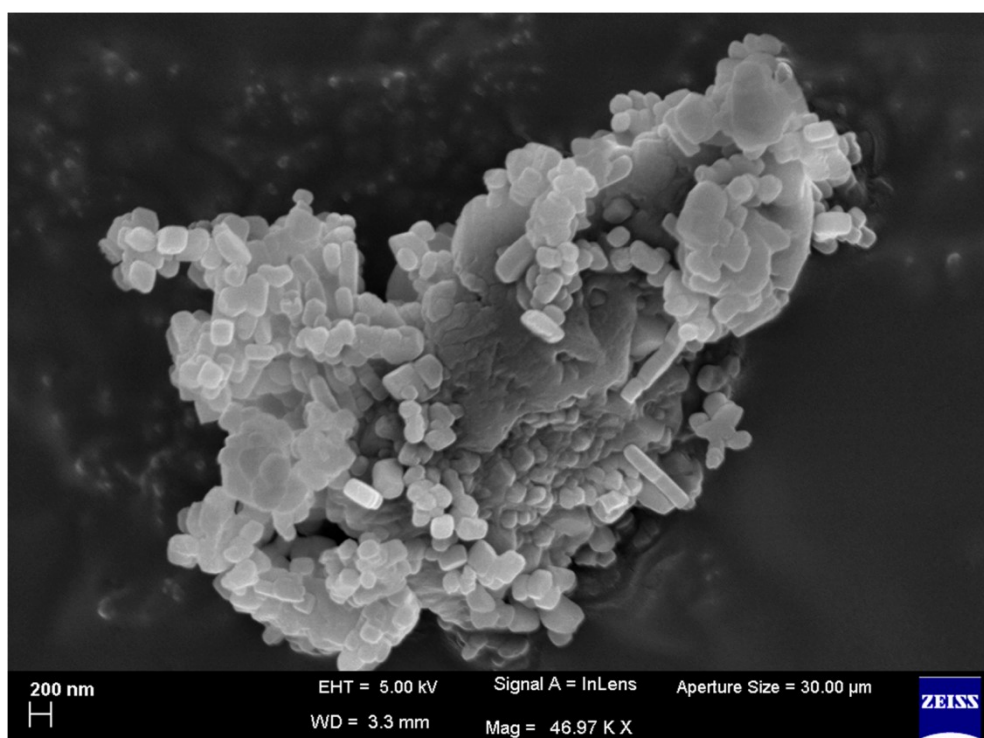

**Figure S3.** SEM image of the recovered Pd@3D PPF after 1<sup>st</sup> run

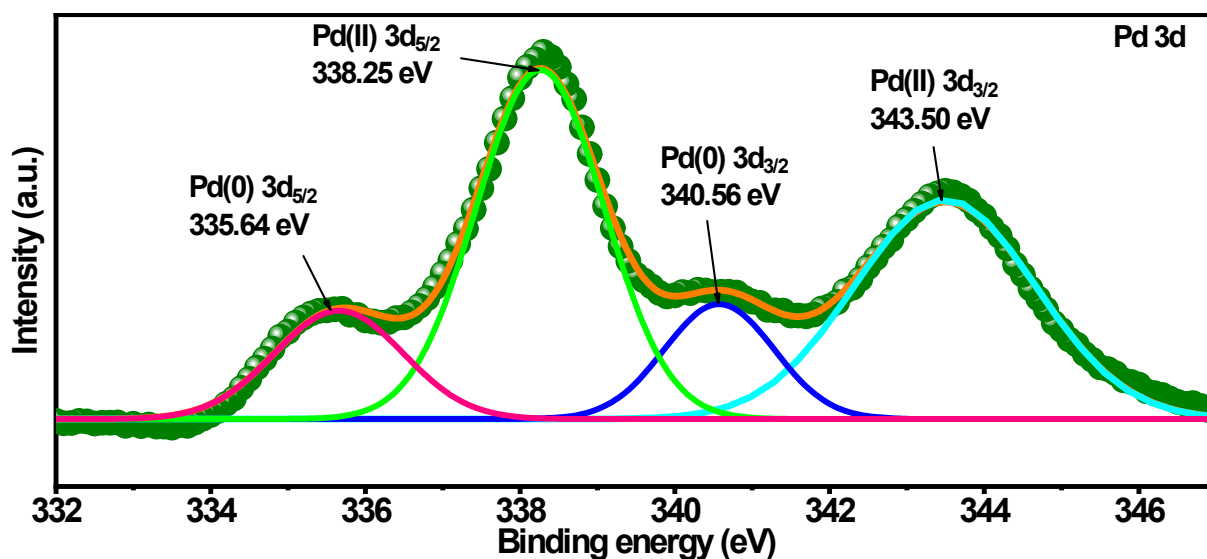

Figure S4. XPS spectra of the recovered catalyst

Table S1. Comparison of Pd@3D PPF with other heterogeneous catalysts for the coupling of epichlorohydrin and CO<sub>2</sub>

| Entry | Catalyst               | Pressure (MPa) | Cocatalyst | Temperature (°C) | Time (h) | yield (%) | References |
|-------|------------------------|----------------|------------|------------------|----------|-----------|------------|
| 1     | MOF-Zn-1               | 1.0            | TBAB       | 100              | 3        | 97        | 1          |
| 2     | UiO-66-OH              | 1.0            | TBAI       | 140              | 2        | 90        | 2          |
| 3     | Gd-MOF                 | 2.0            | TBAB       | 80               | 5        | 99.1      | 3          |
| 4     | MOF-5                  | 0.1            | TBAB       | 50               | 12       | 93        | 4          |
| 5     | F-IRMOF-3              | 2.0            |            | 140              | 1.5      | 80        | 5          |
| 6     | UMCM-1-NH <sub>2</sub> | 1.2            | TBAB       | rt               | 24       | 78        | 6          |
| 7     | Pd@3D PPF              | 0.1            | TBAB       | rt               | 10       | 99        | This work  |

<sup>1</sup>H NMR spectra of 4-(chloromethyl)-1,3-dioxolan-2-one (2c): [7]

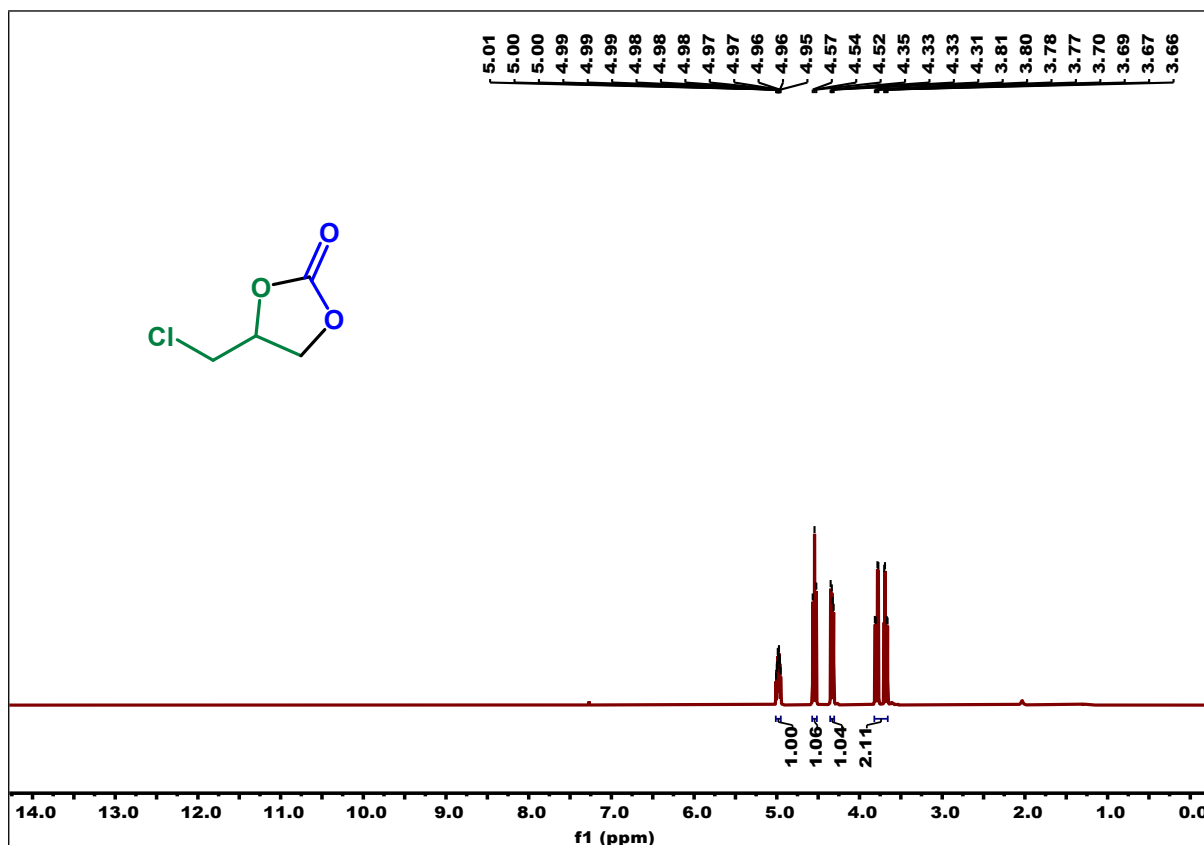

<sup>1</sup>H NMR (400 MHz, CDCl<sub>3</sub>): δ 5.01 – 4.95 (m, 1H), 4.57 – 4.52 (m, 1H), 4.33 (dd, *J* = 8.9, 5.7 Hz, 1H), 3.81 – 3.66 (m, 2H).

<sup>1</sup>H NMR spectra of 4-((allyloxy)methyl)-1,3-dioxolan-2-one (2e):<sup>[7]</sup>

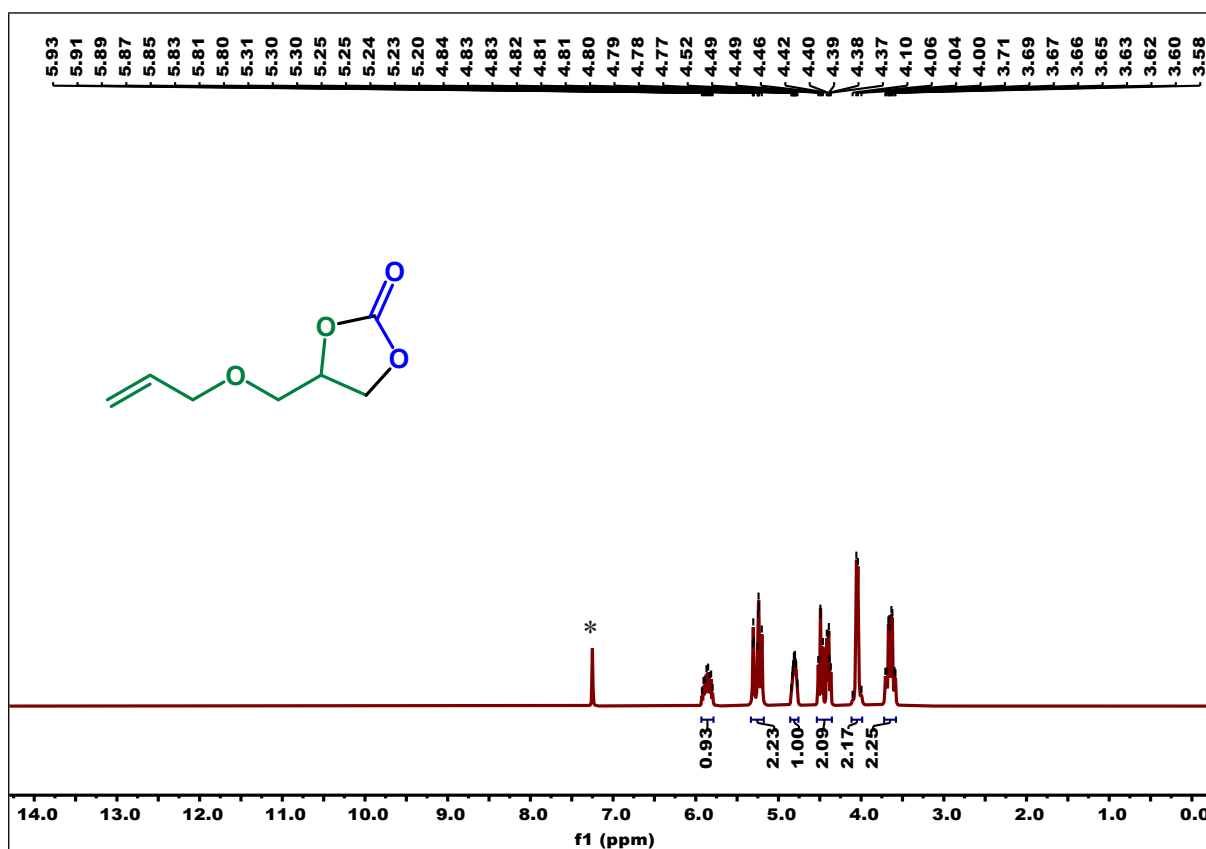

<sup>1</sup>H NMR (400 MHz, CDCl<sub>3</sub> (\*)): δ 5.86 (ddt,  $J = 16.3, 10.8, 5.6$  Hz, 1H), 5.31 – 5.20 (m, 2H), 4.84 – 4.77 (m, 1H), 4.52 – 4.37 (m, 2H), 4.05 (d,  $J = 5.6$  Hz, 2H), 3.64 (ddt,  $J = 14.8, 11.1, 5.3$  Hz, 2H).

<sup>1</sup>H NMR spectra of Hexahydro-benzo[1,3]dioxol-2-one (2f):<sup>[8]</sup>

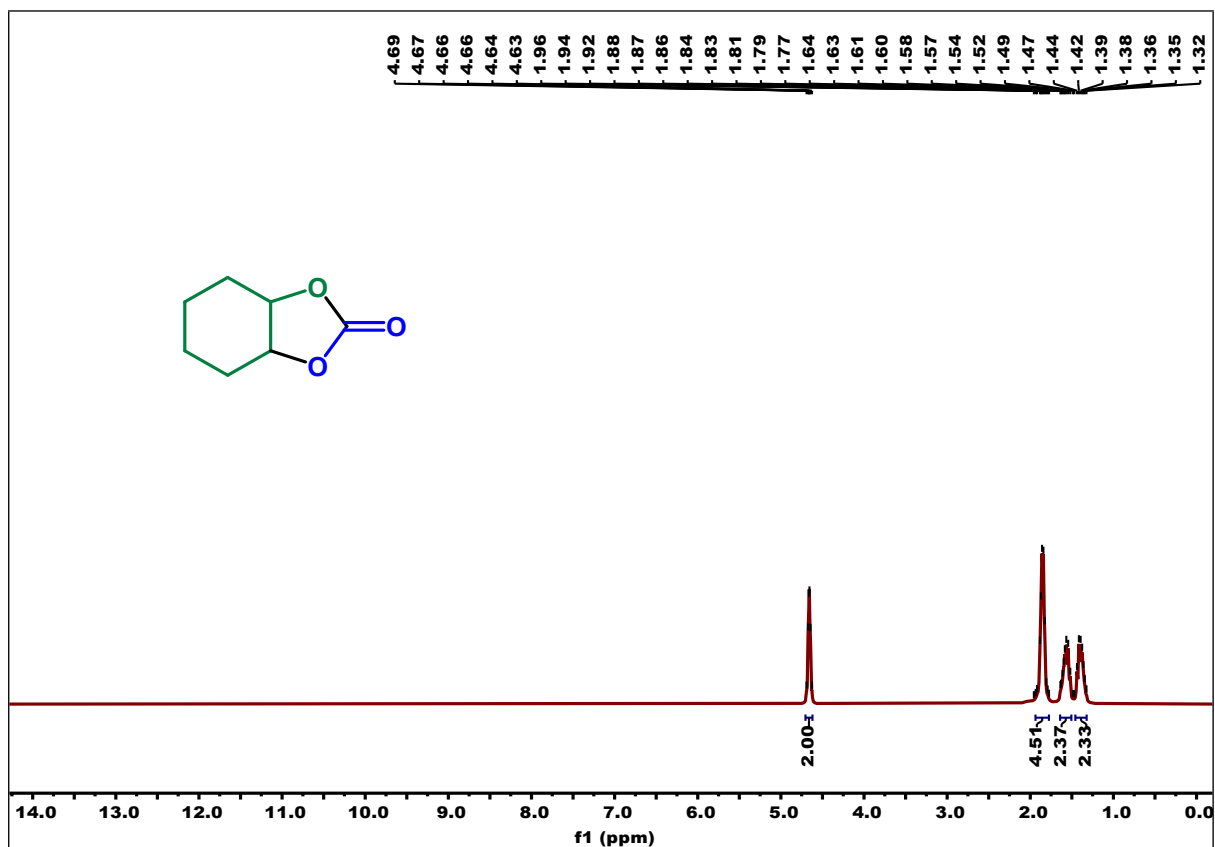

<sup>1</sup>H NMR (400 MHz, CDCl<sub>3</sub>): δ 4.69 – 4.63 (m, 2H), 1.96 – 1.77 (m, 4H), 1.57 (dq, *J* = 14.2, 5.9 Hz, 2H), 1.39 (dt, *J* = 10.2, 5.8 Hz, 2H).



<sup>1</sup>H NMR spectra of 4-phenyl-1,3-dioxolan-2-one:<sup>[7]</sup>

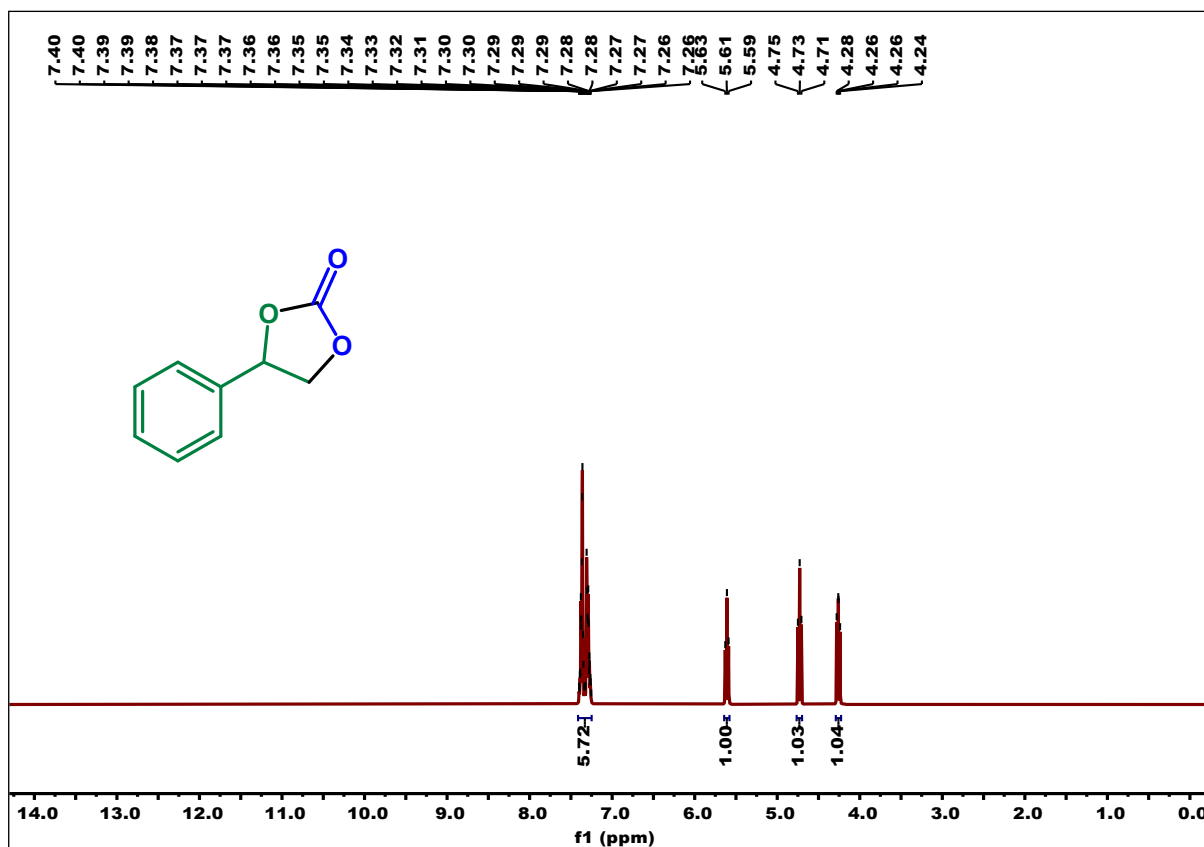

<sup>1</sup>H NMR (400 MHz, CDCl<sub>3</sub>): δ 7.40 – 7.26 (m, 5H), 5.61 (t, *J* = 8.0 Hz, 1H), 4.73 (t, *J* = 8.4 Hz, 1H), 4.26 (dd, *J* = 8.7, 7.8 Hz, 1H).

<sup>1</sup>H NMR spectra of 4-methyl-1,3-dioxolan-2-one (2a):<sup>[8]</sup>

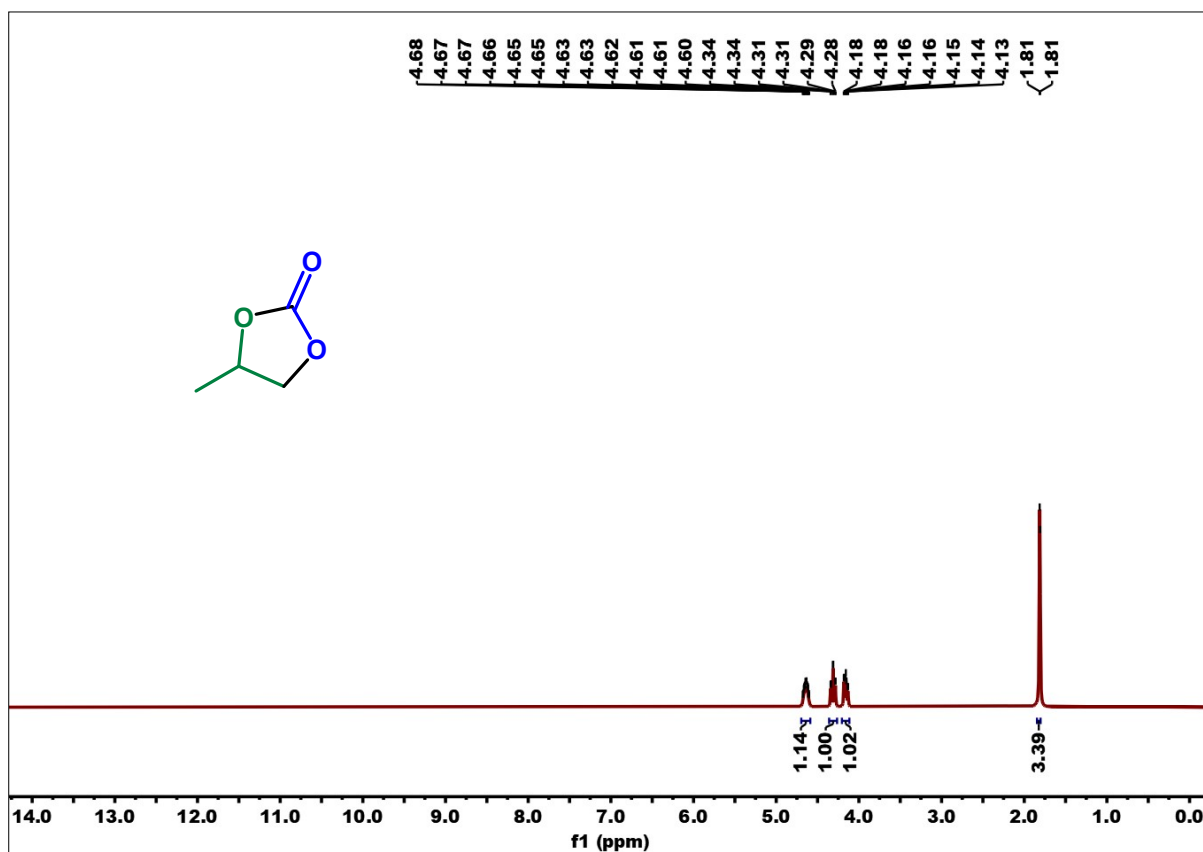

<sup>1</sup>H NMR (400 MHz, CDCl<sub>3</sub>): δ 4.68 – 4.60 (m, 1H), 4.31 (td, *J* = 8.4, 1.3 Hz, 1H), 4.16 (ddd, *J* = 8.1, 5.9, 1.3 Hz, 1H), 1.81 (d, *J* = 1.6 Hz, 3H).

<sup>1</sup>H NMR spectra of 4-(phenoxyethyl)-1,3-dioxolan-2-one (2i):<sup>[8]</sup>

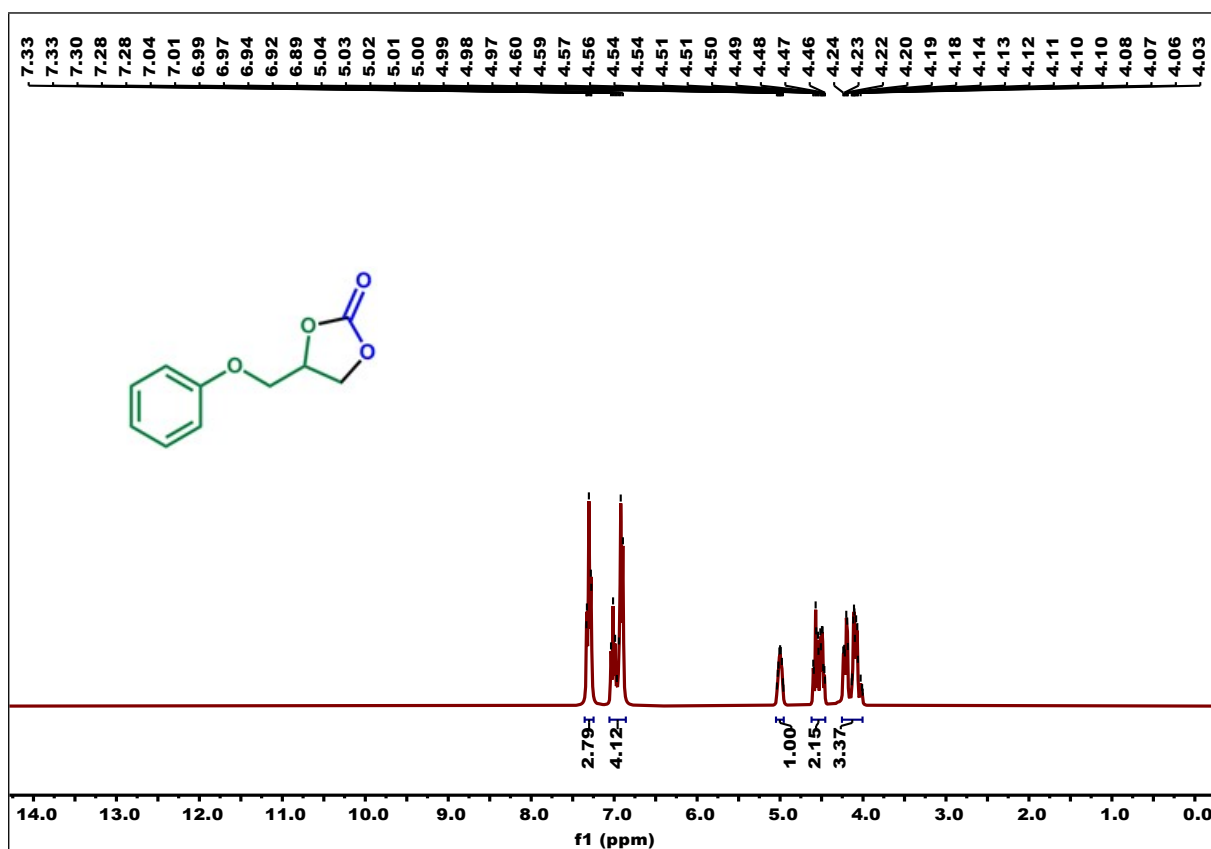

<sup>1</sup>H NMR (400 MHz, CDCl<sub>3</sub>): δ 7.33 – 7.28 (m, 2H), 7.04 – 6.89 (m, 3H), 5.04 – 4.97 (m, 1H), 4.60 – 4.46 (m, 2H), 4.24 – 4.03 (m, 2H).

**<sup>1</sup>H NMR spectra of 4-(4-(oxiran-2-yl)butyl)-1,3-dioxolan-2-one:<sup>[9]</sup>**

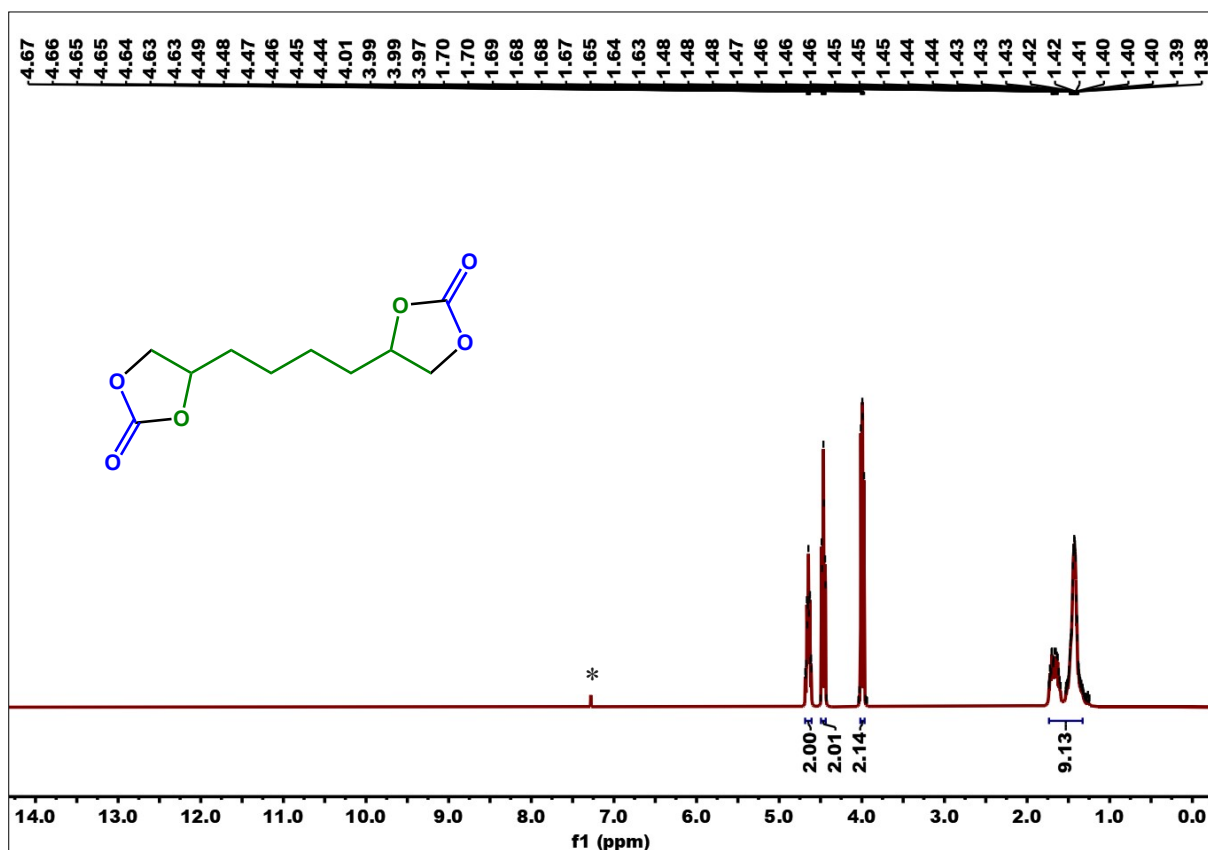

**<sup>1</sup>H NMR (400 MHz, CDCl<sub>3</sub> (\*)):** δ 4.67-4.63 (m, 2H), 4.46 (td, *J* = 8.2, 2.3 Hz, 2H), 4.01 – 3.97 (m, 2H), 1.70 – 1.38 (m, 8H).

**References:**

1. J. Lan, M. Liu, X. Lu, X. Zhang and J. Sun, *ACS Sustainable Chem. Eng.*, 2018, **6**, 8727-8735.
2. J. Noh, Y. Kim, H. Park, J. Lee, M. Yoon, M. H. Park, Y. Kim and M. Kim, *J. Ind. Eng. Chem.*, 2018, **64**, 478-483.
3. Z. Xue, J. Jiang, M.-G. Ma, M.-F. Li and T. Mu, *ACS Sustainable Chem. Eng.*, 2017, **5**, 2623-2631.
4. J. Song, Z. Zhang, S. Hu, T. Wu, T. Jiang and B. Han, *Green Chem.*, 2009, **11**, 1031-1036.
5. X. Zhou, Y. Zhang, X. Yang, L. Zhao and G. Wang, *J. Mol. Catal. A: Chem.*, 2012, **361**, 12-16.
6. R. Babu, A. C. Kathalikkattil, R. Roshan, J. Tharun, D.-W. Kim and D.-W. Park, *Green Chem.*, 2016, **18**, 232-242.

7. S. Motokucho, Y. Takenouchi, R. Satoh, H. Morikawa and H. Nakatani, *ACS Sustainable Chem. Eng.*, 2020, **8**, 4337-4340.
8. S. Sarkar, S. Ghosh and S. M. Islam, *Org. Biomol. Chem.*, 2022, **20**, 1707-1722.
9. J. Steinbauer and T. Werner, *ChemSusChem*, 2017, **10**, 3025-3029.
